# Supplementary material for: La diffusion du système comptable OHADA : conception des principes et déclinaison des pratiques
Source: MDPI journal article supplement (doi:10.3390/toxics10080483), 2009-01-01
Supplement: s1 [file s1]

Table S1. Mean frequencies ( $\pm$ SD) of micronucleated binucleated cells (MNBC), micronuclei in reticulocytes (MN RET), tail intensity (comet assay) and urinary levels of malondialdehyde (MDA) and 8-hydroxydeoxyguanosine (8-OHdG) in exposed and control groups, after stratification according to socio-demographic, lifestyle and occupational activity characteristics.

| Independent variables | Exposed group  |               |                    |                   |                       | Total control group |               |                    |                    |                       |
|-----------------------|----------------|---------------|--------------------|-------------------|-----------------------|---------------------|---------------|--------------------|--------------------|-----------------------|
|                       | MNBC (‰)       | MN RET (‰)    | Tail intensity (%) | MDA (( $\mu$ g/)) | 8-OHdG (( $\mu$ g/L)) | MNBC (‰)            | MN RET (‰)    | Tail intensity (%) | MDA (( $\mu$ g/L)) | 8-OHdG (( $\mu$ g/L)) |
| <i>Country</i>        |                |               |                    |                   |                       |                     |               |                    |                    |                       |
| Belgium               | 11.3 $\pm$ 6.0 | 2.2 $\pm$ 1.1 | 7.0 $\pm$ 1.1      | 65.1 $\pm$ 36.5   | 3.4 $\pm$ 1.6         | 14.1 $\pm$ 7.1      | 2.9 $\pm$ 1.8 | 7.6 $\pm$ 0.9      | 55.4 $\pm$ 32.9    | 3.9 $\pm$ 2.2         |
| Finland               | 9.4 $\pm$ 4.9  | 2.4 $\pm$ 1.6 | 8.2 $\pm$ 1.7      | 54.8 $\pm$ 34.1   | 2.8 $\pm$ 1.9         | 10.6 $\pm$ 5.6      | 2.1 $\pm$ 0.7 |                    | 51.4 $\pm$ 26.3    | 2.4 $\pm$ 1.2         |
| Netherlands           | 15.8 $\pm$ 8.9 |               |                    | 76.7 $\pm$ 37.4   | 4.1 $\pm$ 2.7         | 17.0 $\pm$ 6.4      |               |                    | 80.1 $\pm$ 82.3    | 5.2 $\pm$ 2.1         |
| Poland                | 6.1 $\pm$ 3.7  | 4.1 $\pm$ 2.4 | 6.3 $\pm$ 1.1      | 85.3 $\pm$ 46.8   | 5.2 $\pm$ 4.6         | 9.1 $\pm$ 6.0       | 4.3 $\pm$ 3.1 | 7.5 $\pm$ 1.2      | 90.5 $\pm$ 98.1    | 4.8 $\pm$ 2.3         |
| Portugal              | 6.6 $\pm$ 2.4  | 1.9 $\pm$ 1.0 | 5.5 $\pm$ 1.8      |                   |                       | 4.1 $\pm$ 1.7       | 1.7 $\pm$ 0.5 | 1.7 $\pm$ 1.2      |                    |                       |
| France                |                |               |                    | 103.9 $\pm$ 82.1  | 4.4 $\pm$ 2.3         |                     |               |                    | 99.4 $\pm$ 79.1    | 4.9 $\pm$ 3.2         |
| <i>p</i>              | < 0.001        | < 0.001       | < 0.001            | < 0.001           | < 0.001               | < 0.001             | 0.009         | < 0.001            | 0.192              | 0.003                 |
| <i>Gender</i>         |                |               |                    |                   |                       |                     |               |                    |                    |                       |
| Female                | 12.0 $\pm$ 6.8 | 3.3 $\pm$ 2.2 | 5.3 $\pm$ 1.1      | 84.8 $\pm$ 67.9   | 3.5 $\pm$ 0.6         | 12.2 $\pm$ 6.5      | 3.3 $\pm$ 2.8 | 4.1 $\pm$ 3.5      | 57.1 $\pm$ 58.8    | 4.0 $\pm$ 2.1         |
| Male                  | 9.2 $\pm$ 6.1  | 2.7 $\pm$ 1.9 | 6.5 $\pm$ 1.9      | 76.4 $\pm$ 52.9   | 4.0 $\pm$ 2.3         | 8.9 $\pm$ 6.5       | 2.4 $\pm$ 1.7 | 3.1 $\pm$ 2.8      | 81.6 $\pm$ 73.1    | 4.1 $\pm$ 2.6         |
| <i>p</i>              | 0.452          | 0.736         | 0.171              | 0.800             | 0.510                 | 0.010               | 0.041         | 0.196              | 0.001              | 0.257                 |
| <i>Age</i>            |                |               |                    |                   |                       |                     |               |                    |                    |                       |
| 20-49                 | 8.9 $\pm$ 6.2  | 2.6 $\pm$ 1.7 | 6.3 $\pm$ 2.0      | 78.7 $\pm$ 57.7   | 4.0 $\pm$ 2.4         | 8.9 $\pm$ 6.2       | 2.6 $\pm$ 2.1 | 3.5 $\pm$ 3.0      | 75.2 $\pm$ 74.7    | 4.3 $\pm$ 2.6         |
| 50-68                 | 10.1 $\pm$ 5.7 | 3.1 $\pm$ 2.3 | 6.8 $\pm$ 1.8      | 70.9 $\pm$ 37.8   | 4.0 $\pm$ 1.9         | 12.5 $\pm$ 7.4      | 2.5 $\pm$ 1.6 | 2.3 $\pm$ 2.6      | 71.5 $\pm$ 54.6    | 3.3 $\pm$ 1.7         |
| <i>p</i>              | 0.099          | 0.649         | 0.343              | 0.928             | 0.505                 | 0.078               | 0.413         | 0.707              | 0.437              | 0.428                 |

|                                         |            |           |           |              |           |            |           |           |             |           |
|-----------------------------------------|------------|-----------|-----------|--------------|-----------|------------|-----------|-----------|-------------|-----------|
| <i>Smoking status</i>                   |            |           |           |              |           |            |           |           |             |           |
| Smoker                                  | 9.4 ± 7.0  | 2.8 ± 1.4 | 5.8 ± 1.8 | 83.8 ± 60.2  | 4.2 ± 2.6 | 7.4 ± 6.7  | 2.1 ± 1.0 | 4.2 ± 3.0 | 92.4 ± 84.0 | 5.1 ± 2.5 |
| Former smoker                           | 8.9 ± 5.2  | 2.7 ± 2.1 | 6.5 ± 1.3 | 80.4 ± 63.2  | 3.9 ± 2.3 | 11.0 ± 6.8 | 2.5 ± 0.9 | 2.5 ± 4.0 | 81.9 ± 69.2 | 3.7 ± 2.7 |
| Non smoker                              | 9.4 ± 5.8  | 2.7 ± 2.1 | 6.8 ± 2.2 | 67.8 ± 35.4  | 3.9 ± 2.0 | 10.0 ± 6.5 | 2.7 ± 2.3 | 3.1 ± 2.7 | 69.7 ± 68.1 | 4.0 ± 2.4 |
| <i>p</i>                                | 0.519      | 0.435     | 0.192     | 0.179        | 0.706     | 0.252      | 0.646     | 0.660     | 0.406       | 0.156     |
| <i>Alcohol consumption</i>              |            |           |           |              |           |            |           |           |             |           |
| Low                                     | 8.7 ± 5.6  | 2.5 ± 1.5 | 6.3 ± 1.9 | 72.1 ± 38.9  | 3.6 ± 2.0 | 8.0 ± 5.7  | 2.3 ± 1.5 | 3.4 ± 3.3 | 58.6 ± 68.3 | 3.0 ± 1.9 |
| Medium                                  | 8.23 ± 6.6 | 3.5 ± 2.2 | 6.7 ± 2.0 | 82.4 ± 53.0  | 4.4 ± 2.3 | 7.9 ± 5.4  | 3.0 ± 2.5 | 3.6 ± 3.0 | 79.5 ± 79.8 | 4.5 ± 2.3 |
| High                                    | 10.6 ± 5.6 | 1.9 ± 1.0 | 6.5 ± 1.9 | 72.1 ± 56.5  | 3.8 ± 2.2 | 12.5 ± 7.4 | 2.1 ± 1.2 | 2.3 ± 2.6 | 74.7 ± 62.0 | 4.0 ± 2.6 |
| <i>p</i>                                | 0.002      | <0.001    | 0.733     | 0.272        | 0.382     | 0.007      | 0.295     | 0.174     | 0.307       | 0.516     |
| <i>U-Cr end-shift (µg/g creatinine)</i> |            |           |           |              |           |            |           |           |             |           |
| 1 <sup>st</sup> tertile                 | 7.0 ± 3.5  | 2.8 ± 2.0 | 6.1 ± 2.3 | 94.6 ± 71.5  | 4.3 ± 2.5 | 8.8 ± 6.2  | 2.5 ± 2.0 | 3.3 ± 3.0 | 75.1 ± 73.6 | 4.1 ± 2.5 |
| 2 <sup>nd</sup> tertile                 | 7.6 ± 4.2  | 3.6 ± 2.5 | 6.3 ± 1.8 | 81.3 ± 52.2  | 4.3 ± 2.4 | 11.7 ± 6.9 | 2.8 ± 1.9 | 2.6 ± 1.7 | 72.8 ± 62.9 | 4.1 ± 2.3 |
| 3 <sup>rd</sup> tertile                 | 11.0 ± 7.1 | 2.3 ± 1.3 | 6.9 ± 1.6 | 67.7 ± 44.0  | 3.7 ± 2.1 | 16.8 ± 7.5 |           |           | 69.4 ± 58.4 | 3.2 ± 1.8 |
| <i>p</i>                                | <0.001     | 0.020     | 0.071     | 0.026        | 0.354     | 0.087      | 0.249     | 0.589     | 0.969       | 0.796     |
| <i>Activity/Group</i>                   |            |           |           |              |           |            |           |           |             |           |
| Bath plating workers                    | 12.6 ± 8.0 | 1.9 ± 1.1 | 7.4 ± 1.6 | 72.67 ± 39.6 | 4.1 ± 2.6 |            |           |           |             |           |
| Chromate paint applicators              | 9.7 ± 6.4  | 2.0 ± 1.1 | 5.2 ± 1.3 | 70.6 ± 44.0  | 2.7 ± 0.9 |            |           |           |             |           |

|                               |           |           |           |             |           |            |           |           |             |           |
|-------------------------------|-----------|-----------|-----------|-------------|-----------|------------|-----------|-----------|-------------|-----------|
| Welders                       | 7.4 ± 4.8 | 3.4 ± 2.3 | 7.6 ± 1.9 | 78.6 ± 54.8 | 3.7 ± 2.0 |            |           |           |             |           |
| Machining<br>workers          | 8.0 ± 3.1 | 2.3 ± 1.3 | 5.0 ± 2.0 | 88.8 ± 92.7 | 4.2 ± 2.7 |            |           |           |             |           |
| Other<br>activities           | 9.6 ± 4.8 | 2.0 ± 0.7 | 6.1 ± 1.0 | 59.7 ± 30.5 | 4.1 ± 3.5 |            |           |           |             |           |
| Within<br>company<br>control  |           |           |           |             |           | 12.2 ± 7.6 | 3.1 ± 2.7 | 6.9 ± 2.4 | 74.1 ± 74.2 | 4.2 ± 2.6 |
| Outwith<br>company<br>control |           |           |           |             |           | 7.3 ± 5.5  | 1.9 ± 0.7 | 1.7 ± 1.2 | 51.0 ± 26.1 | 2.3 ± 1.1 |
| <i>p</i>                      | 0.001     | < 0.001   | < 0.001   | 0.745       | 0.608     | 0.001      | 0.041     | < 0.001   | 0.368       | 0.013     |

Table S2. Mean frequencies ( $\pm$ SD) of micronucleated binucleated cells (MNBC), micronuclei in reticulocytes (MN RET), tail intensity (comet assay) and urinary levels of malondialdehyde (MDA) and 8-hydroxydeoxyguanosine (8-OHdG) in control subgroups, after stratification according to socio-demographic, lifestyle and occupational activity characteristics.

| Independent variables | Within company control subgroup |               |                    |                  |                     | Outwith company control subgroup |               |                    |                  |                     |
|-----------------------|---------------------------------|---------------|--------------------|------------------|---------------------|----------------------------------|---------------|--------------------|------------------|---------------------|
|                       | MNBC (‰)                        | MN RET (‰)    | Tail intensity (%) | MDA ( $\mu$ g/L) | 8-OHdG ( $\mu$ g/L) | MNBC (‰)                         | MN RET (‰)    | Tail intensity (%) | MDA ( $\mu$ g/L) | 8-OHdG ( $\mu$ g/L) |
| <i>Country</i>        |                                 |               |                    |                  |                     |                                  |               |                    |                  |                     |
| Belgium               | 14.1 $\pm$ 7.1                  | 2.9 $\pm$ 1.8 |                    | 55.4 $\pm$ 32.9  | 3.9 $\pm$ 2.2       |                                  |               |                    |                  |                     |
| Finland               | 9.1 $\pm$ 4.8                   | 1.8 $\pm$ 0.5 | 7.6 $\pm$ 0.9      | 52.2 $\pm$ 28.9  | 2.6 $\pm$ 1.5       | 11.1 $\pm$ 6.0                   | 2.2 $\pm$ 0.8 |                    | 51.0 $\pm$ 26.1  | 2.3 $\pm$ 1.1       |
| Netherlands           | 17.0 $\pm$ 6.4                  |               | 7.5 $\pm$ 1.2      | 80.1 $\pm$ 82.3  | 5.2 $\pm$ 2.1       |                                  |               |                    |                  |                     |
| Poland                | 9.1 $\pm$ 6.0                   | 4.3 $\pm$ 3.1 |                    | 90.5 $\pm$ 98.1  | 4.8 $\pm$ 2.3       |                                  |               |                    |                  |                     |
| Portugal              |                                 |               |                    |                  |                     | 4.1 $\pm$ 1.8                    | 1.7 $\pm$ 0.5 | 1.7 $\pm$ 1.2      |                  |                     |
| France                |                                 |               |                    | 99.4 $\pm$ 79.1  | 4.9 $\pm$ 3.2       |                                  |               |                    |                  |                     |
| <i>p</i>              | 0.001                           | 0.175         | 0.144              | 0.293            | 0.049               | < 0.001                          | 0.040         |                    |                  |                     |
| <i>Gender</i>         |                                 |               |                    |                  |                     |                                  |               |                    |                  |                     |
| Female                | 12.5 $\pm$ 6.6                  | 3.7 $\pm$ 3.0 | 7.1 $\pm$ 1.0      | 57.7 $\pm$ 60.2  | 4.1 $\pm$ 2.2       | 10.7 $\pm$ 7.6                   | 1.9 $\pm$ 0.8 | 1.1 $\pm$ 0.3      |                  |                     |
| Male                  | 11.1 $\pm$ 7.1                  | 3.2 $\pm$ 2.5 | 6.5 $\pm$ 3.1      | 92.1 $\pm$ 81.1  | 4.7 $\pm$ 2.6       | 7.1 $\pm$ 5.3                    | 1.9 $\pm$ 0.7 | 1.8 $\pm$ 1.3      | 51.5 $\pm$ 27.0  | 2.3 $\pm$ 1.1       |
| <i>p</i>              | 0.100                           | 0.174         | 0.216              | <0.001           | 0.067               | 0.408                            | 0.687         | 0.219              |                  |                     |
| <i>Age</i>            |                                 |               |                    |                  |                     |                                  |               |                    |                  |                     |
| 20-49                 | 10.4 $\pm$ 6.4                  | 3.3 $\pm$ 2.7 | 6.5 $\pm$ 2.9      | 82.0 $\pm$ 80.9  | 4.8 $\pm$ 2.6       | 7.0 $\pm$ 5.5                    | 1.9 $\pm$ 0.6 | 1.9 $\pm$ 1.4      | 46.8 $\pm$ 25.6  | 2.2 $\pm$ 1.1       |
| 50-68                 | 15.8 $\pm$ 7.2                  | 3.7 $\pm$ 2.1 | A                  | 73.8 $\pm$ 60.0  | 3.5 $\pm$ 1.8       | 8.7 $\pm$ 5.9                    | 1.9 $\pm$ 0.9 | 1.2 $\pm$ 0.5      | 62.5 $\pm$ 27.3  | 2.7 $\pm$ 1.2       |
| <i>p</i>              | 0.093                           | 0.561         | 0.897              | 0.623            | 0.219               | 0.462                            | 0.596         | 0.517              | 0.240            | 0.433               |

|                                            |            |           |           |              |           |            |           |           |             |           |
|--------------------------------------------|------------|-----------|-----------|--------------|-----------|------------|-----------|-----------|-------------|-----------|
| <i>Smoking status</i>                      |            |           |           |              |           |            |           |           |             |           |
| Smoker                                     | 12.7 ± 7.0 | 2.8 ± 1.2 | 7.7 ± 0.2 | 100.0 ± 94.9 | 5.7 ± 2.3 | 3.0 ± 1.0  | 1.5 ± 0.3 | 2.4 ± 1.5 | 65.9 ± 24.7 | 3.0 ± 2.3 |
| Former smoker                              | 11.9 ± 8.9 | 1.9 ± 0.6 | 4.5 ± 5.8 | 87.4 ± 82.9  | 4.2 ± 3.2 | 10.2 ± 5.4 | 2.7 ± 0.9 | 0.6 ± 0.3 | 70.9 ± 35.7 | 2.5 ± 0.9 |
| Non smoker                                 | 11.4 ± 6.7 | 3.7 ± 2.9 | 7.2 ± 1.1 | 75.6 ± 72.7  | 4.3 ± 2.4 | 7.9 ± 5.8  | 1.8 ± 0.5 | 1.7 ± 1.1 | 38.9 ± 14.7 | 2.1 ± 1.0 |
| <i>p</i>                                   | 0.752      | 0.595     | 0.749     | 0.486        | 0.148     | 0.006      | 0.030     | 0.054     | 0.103       | 0.710     |
| <i>Alcohol consumption</i>                 |            |           |           |              |           |            |           |           |             |           |
| Low                                        | 10.0 ± 6.4 | 2.9 ± 2.0 | 7.4 ± 1.0 | 60.5 ± 71.8  | 3.2 ± 1.9 | 5.8 ± 4.2  | 1.7 ± 0.2 | 2.1 ± 1.9 |             |           |
| Medium                                     | 9.5 ± 5.9  | 3.9 ± 3.0 |           | 83.2 ± 84.4  | 4.8 ± 2.3 | 5.4 ± 3.4  | 2.0 ± 0.7 | 1.7 ± 1.2 | 55.4 ± 34.8 | 2.3 ± 0.8 |
| High                                       | 15.0 ± 7.3 | 2.5 ± 1.8 | 3.9 ± 5.0 | 84.0 ± 69.4  | 4.6 ± 2.8 | 9.9 ± 6.7  | 1.9 ± 0.8 | 1.5 ± 0.5 | 50.3 ± 25.1 | 2.4 ± 1.2 |
| <i>p</i>                                   | 0.040      | 0.374     | 0.476     | 0.238        | 0.435     | 0.166      | 0.586     | 0.953     | 0.882       | 0.651     |
| <i>U-Cr end-shift</i><br>(µg/g creatinine) |            |           |           |              |           |            |           |           |             |           |
| 1 <sup>st</sup> tertile                    | 10.3 ± 6.7 | 3.4 ± 2.8 | 6.6 ± 2.7 | 84.3 ± 83.6  | 4.7 ± 2.6 | 7.6 ± 5.7  | 1.9 ± 0.7 | 1.6 ± 1.2 | 51.0 ± 26.1 | 2.3 ± 1.1 |
| 2 <sup>nd</sup> tertile                    | 12.3 ± 6.7 | 3.1 ± 2.1 |           | 72.8 ± 62.9  | 4.1 ± 2.3 | 4.3 ± 1.8  | 1.6 ± 0.1 | 2.6 ± 1.7 |             |           |
| 3 <sup>rd</sup> tertile                    | 16.8 ± 7.5 |           |           | 69.4 ± 58.4  | 3.2 ± 1.8 |            |           |           |             |           |
| <i>p</i>                                   | 0.219      | 0.391     | 0.245     | 0.798        | 0.578     | 0.436      | 0.670     | 0.325     |             |           |

Table S3. Level of oxidative stress biomarkers parameters (mean  $\pm$  SD) in groups of workers exposed to Cr(VI) and controls.

|                            | Pre-shift  |                                                 |                                                | Post-shift |                                   |                                   |
|----------------------------|------------|-------------------------------------------------|------------------------------------------------|------------|-----------------------------------|-----------------------------------|
|                            | n          | MDA ( $\mu\text{g/L}$ )                         | 8-OHdG ( $\mu\text{g/L}$ )                     | n          | MDA ( $\mu\text{g/L}$ )           | 8-OHdG ( $\mu\text{g/L}$ )        |
| <b>Exposed Group</b>       | <b>214</b> | <b>87.5 <math>\pm</math> 78.0*<sup>£¥</sup></b> | <b>4.77 <math>\pm</math> 2.70<sup>£¥</sup></b> | <b>213</b> | <b>76.5 <math>\pm</math> 54.9</b> | <b>4.05 <math>\pm</math> 2.64</b> |
| Bath plating workers       | 57         | 81.2 $\pm$ 45.2* <sup>£¥</sup>                  | 4.92 $\pm$ 2.43 <sup>£¥</sup>                  | 57         | 72.7 $\pm$ 39.6                   | 4.12 $\pm$ 2.63                   |
| Chromate paint applicators | 8          | 82.4 $\pm$ 39.0 <sup>£</sup>                    | 4.12 $\pm$ 1.95 <sup>£</sup>                   | 8          | 70.6 $\pm$ 44.0                   | 2.71 $\pm$ 0.92*                  |
| Welders                    | 110        | 87.9 $\pm$ 96.0 <sup>£¥</sup>                   | 5.01 $\pm$ 3.10 <sup>£¥</sup>                  | 110        | 78.7 $\pm$ 55.0                   | 4.17 $\pm$ 2.71                   |
| Machining workers          | 24         | 97.2 $\pm$ 64.1* <sup>£¥</sup>                  | 4.09 $\pm$ 1.99 <sup>£</sup>                   | 23         | 88.8 $\pm$ 92.7                   | 3.72 $\pm$ 2.05                   |
| Other activities           | 15         | 97.6 $\pm$ 74.6 <sup>£</sup>                    | 3.82 $\pm$ 1.55 <sup>£</sup>                   | 15         | 59.7 $\pm$ 30.5                   | 4.11 $\pm$ 3.49                   |
| <b>Total control Group</b> | <b>84</b>  | <b>71.3 <math>\pm</math> 75.5</b>               | <b>3.89 <math>\pm</math> 2.53</b>              | <b>-</b>   | <b>-</b>                          | <b>-</b>                          |
| Within company control     | 69         | 75.8 $\pm$ 81.9                                 | 4.23 $\pm$ 2.62 <sup>£</sup>                   | -          | -                                 | -                                 |
| Outwith company control    | 15         | 51.0 $\pm$ 26.1                                 | 2.32 $\pm$ 1.09*                               | -          | -                                 | -                                 |
